# Supplementary material for: Rapid Classification of Sarcomas Using Methylation Fingerprint: A Pilot Study
Source: Cancers (Basel). 2023 Aug 18;15(16):4168. doi: 10.3390/cancers15164168 (PMC10453223; doi:10.3390/cancers15164168)
Supplement: Supplementary file 1 [file cancers-15-04168-s001.zip › Table S1.xlsx]

## Sheet: For Article Table S1
sample	Max Calibrated Dx	Pathology	Pathology Methyaltion Class	Concordance	Max Confidence Score	Mean Read Length	Mean Coverage	MDM2 Amplification	t-SNE Agreed Clusternig	RF %Vote of Max Dx	Num of Reads	Total Bases Sequenced	CpG Count	RF OOB error
SARC-01	WDLS/DDLS	Well differentiated liposarcoma	WDLS/DDLS	C	0.0914213	5191.8	0.43	Y	Y	6	265095	1343242000	97587	0.0204271
SARC-02	MLS	Metastatic myxoid liposarcoma	MLS	C	0.301771	5037.7	6.4		Y	27.65	4033554	19808876279	100000	0.0185701
SARC-03	LMS	leiomyosarcoma	LMS	C	0.211523	5678.9	1.78		Y	9.35	1082033	5502662002	100000	0.0139276
SARC-04	USARC	Undifferentiated small round spindle cell sarcoma	USARC	C	0.0819372	1956.6	0.08			4.6	126977	234329001	18136	0.0213556
SARC-05	EMCS	Extraskeletal myxoid chondrosarcoma	EMCS	C	0.875637	4537	0.11		Y	22.85	78072	343810248	26439	0.0232126
SARC-06	WDLS/DDLS	Dedifferentiated liposarcoma	WDLS/DDLS	C	0.077372	1310.3	0.05	Y	Y	4.4	134682	161021011	11564	0.0204271
SARC-08	WDLS/DDLS	Well differentiated liposarcoma	WDLS/DDLS	C	0.0962831	5121.4	0.03			4.8	17300	85988314	6539	0.0241411
SARC-09	WDLS/DDLS	Highly suspicious for well differentiated liposarcoma	WDLS/DDLS	C	0.452094	5563.6	0.07	Y	Y	9.35	39969	217003555	16427	0.0204271
SARC-10	EWS	Ewing´s sarcoma	EWS	C	0.137994	3080.8	0.06		Y	8.5	66443	197824758	14329	0.0287837
SARC-11	WDLS/DDLS	Well differentiated liposarcoma	WDLS/DDLS	C	0.152797	5243.7	0.04	Y	Y	6.35	21717	111352893	7545	0.0259981
SARC-17	MLS	Myxoid liposarcoma	MLS	C	0.361844	5899.5	0.06		Y	27.3	29826	171445039	13342	0.0241411
SARC-18	CSA (A)	Chondrosarcoma	CSA (A)	C	0.531798	2638	0.05		Y	7.3	55829	140199667	9745	0.0241411
SARC-19	WDLS/DDLS	Well differentiated liposarcoma	WDLS/DDLS	C	0.144923	7078.3	0.05	Y	Y	5.95	22415	154201354	11948	0.0194986
SARC-21	SYSA	synovial sarcoma	SYSA	C	0.231895	2622.5	0.04		Y	12.75	48714	122258681	9934	0.0250696
SARC-13	MPNST	chondrosarcoma	CHORD	D	0.0384875	1774	0.06			3	106661	178283289	13983	0.0278552
SARC-12	WDLS/DDLS	Myxofibrosarcoma	USARC	D	0.0677039	3071.7	0.06		Y	4.45	61029	180784337	11745	0.0213556
SARC-22	AFH	Myxofibrosarcoma	USARC	D	0.0425215	2748.7	0.04			4.05	47450	125501748	8132	0.0250696
SARC-07	EWS	Unclassified spindle-round cell sarcoma	SRBCS	D	0.907032	2830.3	0.08		Y	29.9	94770	257156223	19304	0.0232126
